# Supplementary material for: Growing up in Bradford: protocol for the age 7–11 follow up of the Born in Bradford birth cohort
Source: Springer Nature journal article supplement (doi:10.1186/s12889-019-7222-2), 2019-07-12
Supplement: MOESM1 [file 16924794]

## Additional File 1: Summary of existing data by participant group

Table A1.1 Summary of existing data by participant group

|                                                            | Mother                                                                                                                                                                                                                                                   | Child                                                                                                                                                                                                                                                  | Father                                                        |
|------------------------------------------------------------|----------------------------------------------------------------------------------------------------------------------------------------------------------------------------------------------------------------------------------------------------------|--------------------------------------------------------------------------------------------------------------------------------------------------------------------------------------------------------------------------------------------------------|---------------------------------------------------------------|
| <b>Recruited</b>                                           | 12453 mothers (across 13776 pregnancies)                                                                                                                                                                                                                 | 13858 children                                                                                                                                                                                                                                         | 3353 fathers                                                  |
| <b>Pregnancy/birth</b>                                     |                                                                                                                                                                                                                                                          |                                                                                                                                                                                                                                                        |                                                               |
| Socio-demographics and health questionnaire at recruitment | 10519 mothers (across 11395 pregnancies)                                                                                                                                                                                                                 |                                                                                                                                                                                                                                                        | 3287 fathers (across 3387 pregnancies)                        |
| Stored biosamples                                          | <p><i>Pregnancy bloods:</i><br/>11625 mothers<br/>Stored as serum, EDTA plasma, red blood cells, whole blood.</p> <p><i>DNA:</i><br/>10531 mothers (across 11436 pregnancies)</p> <p><i>Pregnancy urine:</i><br/>6996 pregnancies</p>                    | <p><i>Cord bloods:</i><br/>9303 children<br/>Stored as serum, EDTA plasma, red blood cells, whole blood</p> <p><i>DNA:</i><br/>9158 children</p> <p><i>Infant serum:</i><br/>1688 children at 12m<br/>1536 children at 24m<br/>664 children at 48m</p> | <p><i>DNA:</i><br/>2938 fathers (across 3022 pregnancies)</p> |
| Blood biomarkers                                           | 10685 mothers (across 11625 pregnancies)                                                                                                                                                                                                                 | 7910 children                                                                                                                                                                                                                                          |                                                               |
| Metabolite profiles                                        | <p><i>High throughput NMR:</i><br/>10574 mothers fasted blood samples 24-28 weeks gestation (across 11479 pregnancies)</p> <p><i>Mass-spectrometry:</i><br/>3000 mothers fasted blood samples 24-28 weeks gestation, 1000 of which paired with child</p> | <p><i>High throughput NMR:</i><br/>7890 children at birth (cord-blood)<br/>1690 children at 12m<br/>1536 children at 24m</p> <p><i>Mass-spectrometry:</i><br/>1000 children paired with mother</p>                                                     |                                                               |

|                                                                                                                                                                                                                                                                                 | <b>Mother</b>                                                                                                                                                                                                        | <b>Child</b>                                                                                                                                                                                          | <b>Father</b>                            |
|---------------------------------------------------------------------------------------------------------------------------------------------------------------------------------------------------------------------------------------------------------------------------------|----------------------------------------------------------------------------------------------------------------------------------------------------------------------------------------------------------------------|-------------------------------------------------------------------------------------------------------------------------------------------------------------------------------------------------------|------------------------------------------|
| Genome-wide SNPs, sequencing, and DNA methylation                                                                                                                                                                                                                               | <i>Genome-wide SNPs:</i><br>10531 mothers<br><br><i>Exome sequencing:</i><br>3005 mothers<br><br><i>White blood cell DNA methylation:</i><br>1000 mothers on samples taken 24-28 weeks gestation (paired with child) | <i>Genome-wide SNPs:</i><br>9158 children<br><br><i>Exome sequencing:</i><br>262 children<br><br><i>White blood cell DNA methylation:</i><br>1000 children taken from cord-blood (paired with mother) | <i>Genome-wide SNPs:</i><br>1283 fathers |
| <b>Anthropometry</b><br>Counts of participants measured in time periods relative to child age, taken from multiple sources: Primary and secondary care records, health visiting records, National Child Measurement Programme, school nurse visits, and researcher-led clinics. |                                                                                                                                                                                                                      |                                                                                                                                                                                                       |                                          |
| Pregnancy booking<br>Pregnancy recruitment<br>Pregnancy 3 <sup>rd</sup> trimester<br>Child birth<br>Child at 1m to 9m<br>Child at 10m to 15m<br>Child at 16m to 21m<br>Child at 22m to 33m<br>Child at 34m to 45m<br>Child at 46m to 69m                                        | 11532 mothers<br>10146 mothers<br>5681 mothers<br><br>1282 mothers<br>1495 mothers<br>1217 mothers<br>1136 mothers<br>1049 mothers                                                                                   | 13656 children<br>12809 children<br>4074 children<br>2433 children<br>8256 children<br>1049 children<br>10188 children                                                                                |                                          |
| <b>Routine data linkage</b>                                                                                                                                                                                                                                                     |                                                                                                                                                                                                                      |                                                                                                                                                                                                       |                                          |
| Glucose tolerance test at pregnancy recruitment                                                                                                                                                                                                                                 | 11231 mothers (12331 across pregnancies)                                                                                                                                                                             |                                                                                                                                                                                                       |                                          |
| Maternity data linkage                                                                                                                                                                                                                                                          | <i>Maternity electronic patient record:</i><br>13361 pregnancies<br><br><i>Abstraction from maternity notes:</i><br>10939 pregnancies<br><br><i>Ultrasound scans:</i><br>13248 pregnancies                           | <i>Maternity electronic patient record:</i><br>13525 children                                                                                                                                         |                                          |
| Primary care records                                                                                                                                                                                                                                                            | 12311 mothers                                                                                                                                                                                                        | 13776 children                                                                                                                                                                                        | 3296 fathers                             |
| Secondary care records                                                                                                                                                                                                                                                          | 12342 mothers                                                                                                                                                                                                        | 12469 children                                                                                                                                                                                        |                                          |

|                                                                               | <b>Mother</b> | <b>Child</b>                                                         | <b>Father</b> |
|-------------------------------------------------------------------------------|---------------|----------------------------------------------------------------------|---------------|
| Education records                                                             |               | 11667 children                                                       |               |
| <b>Child sub-cohort follow-ups</b>                                            |               |                                                                      |               |
| Behavioural correlates of obesity survey (6, 12, 18, 24, 36 month follow-ups) |               | 1763 children                                                        |               |
| Allergies and infections survey (12, 24, 48 month follow-ups)                 |               | 2553 children at 12m<br>2067 children at 24m<br>2594 children at 48m |               |
| Cognitive assessments at school entry (4-5 years)                             |               | 3444 children                                                        |               |
