# Supplementary material for: Growing up in Bradford: protocol for the age 7–11 follow up of the Born in Bradford birth cohort
Source: Springer Nature journal article supplement (doi:10.1186/s12889-019-7222-2), 2019-07-12
Supplement: MOESM5 [file 12889_2019_7222_MOESM5_ESM.pdf]

You can find out more about  
Born in Bradford here:  
[www.borninbradford.nhs.uk](http://www.borninbradford.nhs.uk)

|   |   |   |   |   |   |   |   |   |   |   |   |   |   |   |
|---|---|---|---|---|---|---|---|---|---|---|---|---|---|---|
| B | U | W | M | G | H | C | O | L | N | T | A | M | R | S |
| B | O | G | A | O | L | A | M | H | M | B | H | T | E | Y |
| A | E | R | A | F | R | W | O | O | L | C | I | T | Y | C |
| U | B | O | N | C | E | R | B | W | Z | O | G | N | E | G |
| P | U | W | G | I | F | A | I | Q | D | L | O | P | C | I |
| L | B | I | I | T | N | O | W | S | C | O | Y | U | O | B |
| A | P | N | F | Y | A | B | U | S | O | S | E | E | L | N |
| G | H | G | U | P | W | U | R | M | D | N | S | B | O | T |
| R | P | U | J | A | L | A | L | A | Y | E | S | C | U | Y |
| L | R | P | E | R | H | U | B | T | D | M | C | E | R | F |
| I | K | I | A | K | O | S | C | P | L | F | H | R | I | D |
| E | H | J | M | K | L | C | Y | M | I | M | O | L | O | C |
| A | F | A | M | I | L | Y | R | C | C | B | O | R | B | U |
| C | Y | E | L | B | E | P | O | R | Y | M | L | W | D | O |
| P | A | C | A | L | H | A | M | B | R | A | D | E | C | L |

- City park
- Born in Bradford
- Family
- Bus
- School
- Growing up
- Wool city
- Morrisons
- Alhambra
- Eye colour

[@BiBResearch](#) [Born in Bradford](#) [www.borninbradford.nhs.uk](http://www.borninbradford.nhs.uk)

Child feedback leaflet Version 1 16.12.16

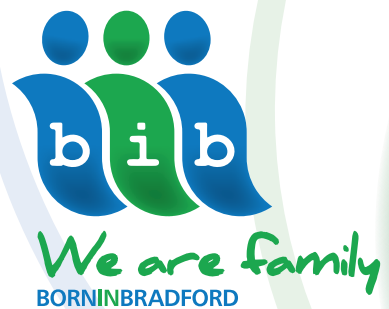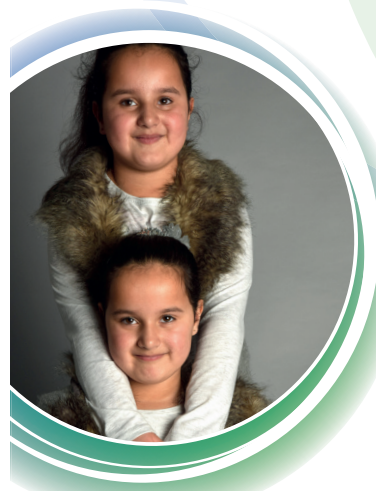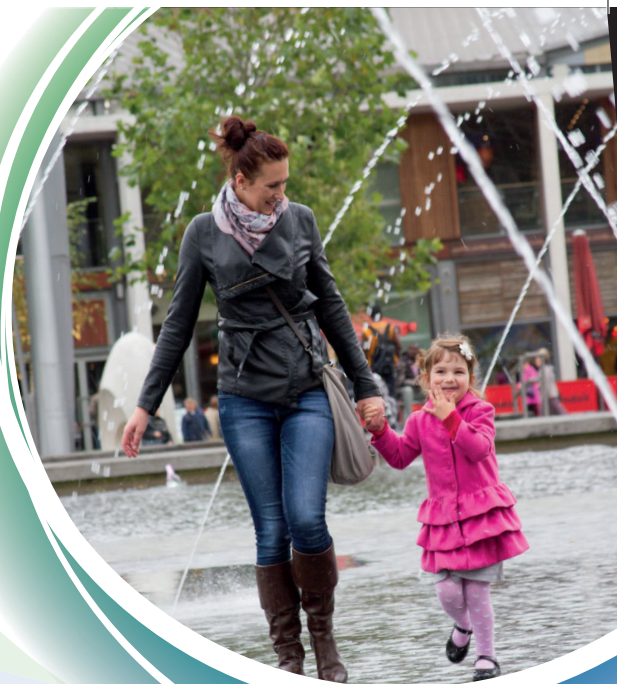

# My Born in Bradford Adventure

## My Name is

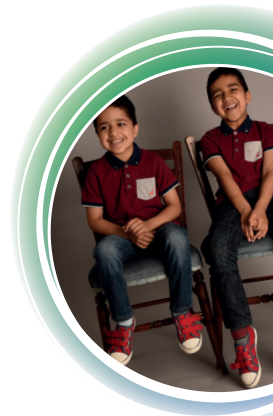

Child feedback leaflet Version 1 16.12.16

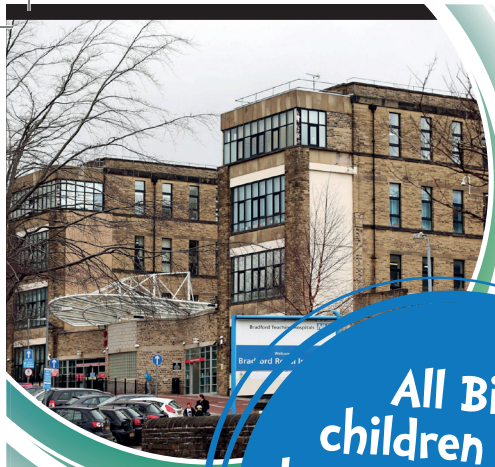

# You are part of Born in Bradford

Now all BiB children are at primary school!

All BiB children were born at Bradford hospital between 2007 and 2011

**Birth**  
When you were a baby you helped us to find out that clean air is good for babies'. **Because of this**, now buses in Bradford don't make the air so dirty.

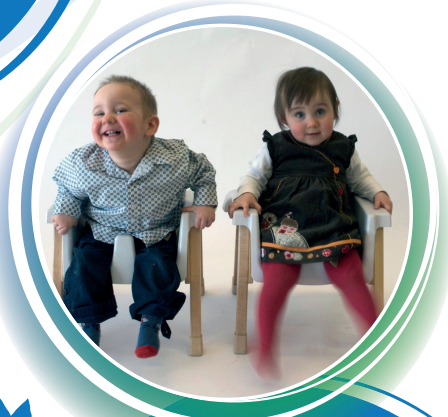

**Age 4**  
When you started school you showed us how to help children do well in class. **Because of this**, now we can help children with their hand-writing which helps their learning!

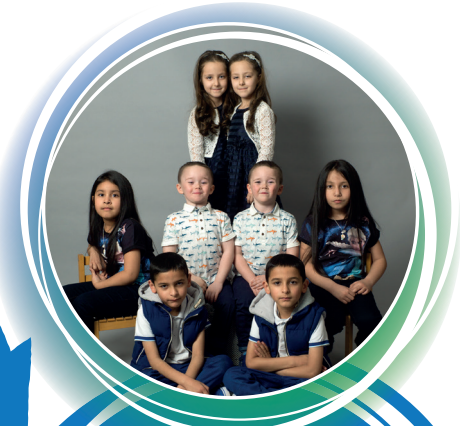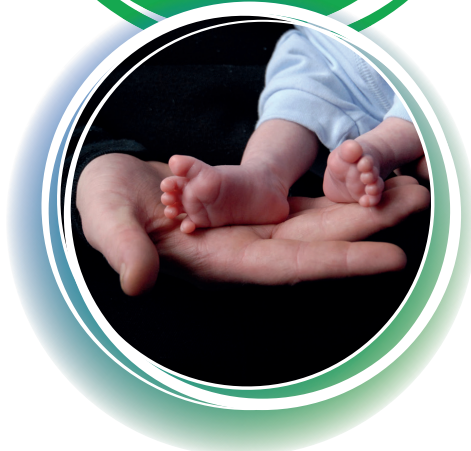

**Age 2**  
When you were a toddler you showed us that doing fun activities with your parents makes you healthy and happy. **Because of this**, now families come and do fun activities in school playgrounds together.

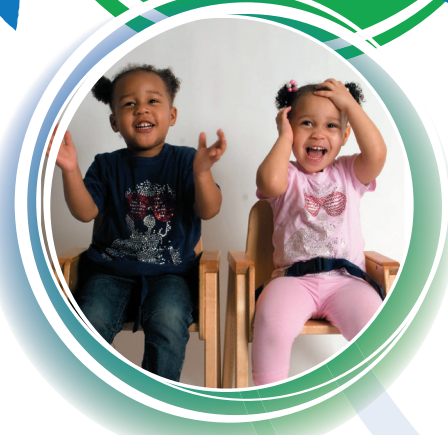

**Age 6-8+**  
Now you are GROWING UP you can tell us all about your life. You are showing us how to help children in Bradford even more!

## Amazing facts about Bradford

# All About Bradford

The nickname for Bradford is wool city. This is because there were lots of mills making cloth from wool in the 1800s.

Bradford City Football Club were the first League 2 side to reach a major cup final at Wembley in 2013.

William Morrison, who started Morrisons supermarket was from Bradford.

Children in Bradford were the first in England to get free school meals, thanks to Margaret McMillian.

Bradford is the curry capital of Britain and has been for 6 years in a row!

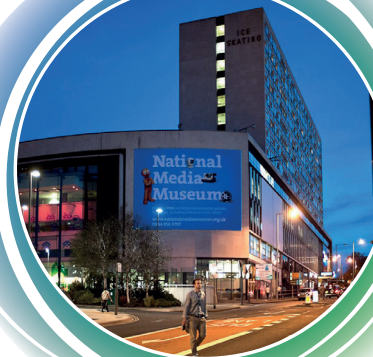

Bradford Industrial Museum

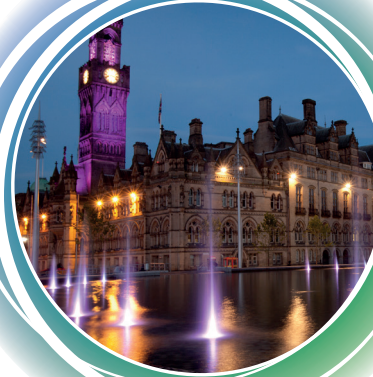

National Media Museum

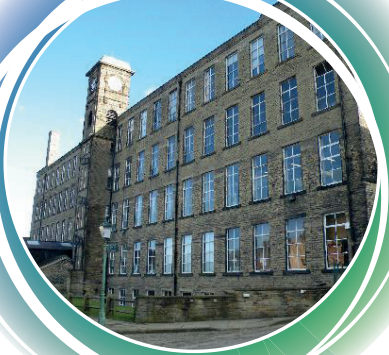

Lister Park

Match up these famous places!

City Park

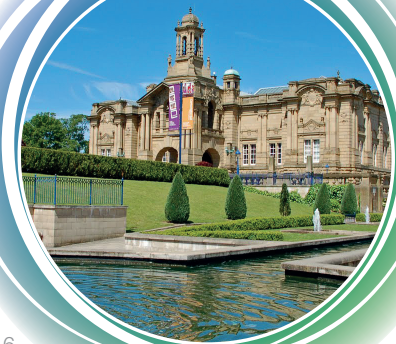

# BiB Growing Up

Thank you for taking part in Growing Up! Your answers will be used in our research. Just knowing a little bit about you can help us a lot!

A little bit about me...

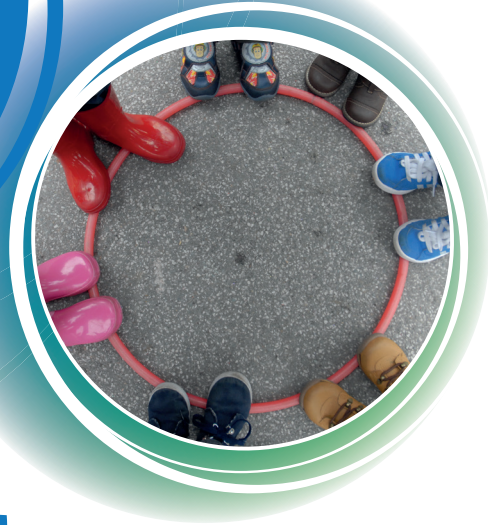

Here is a picture of me

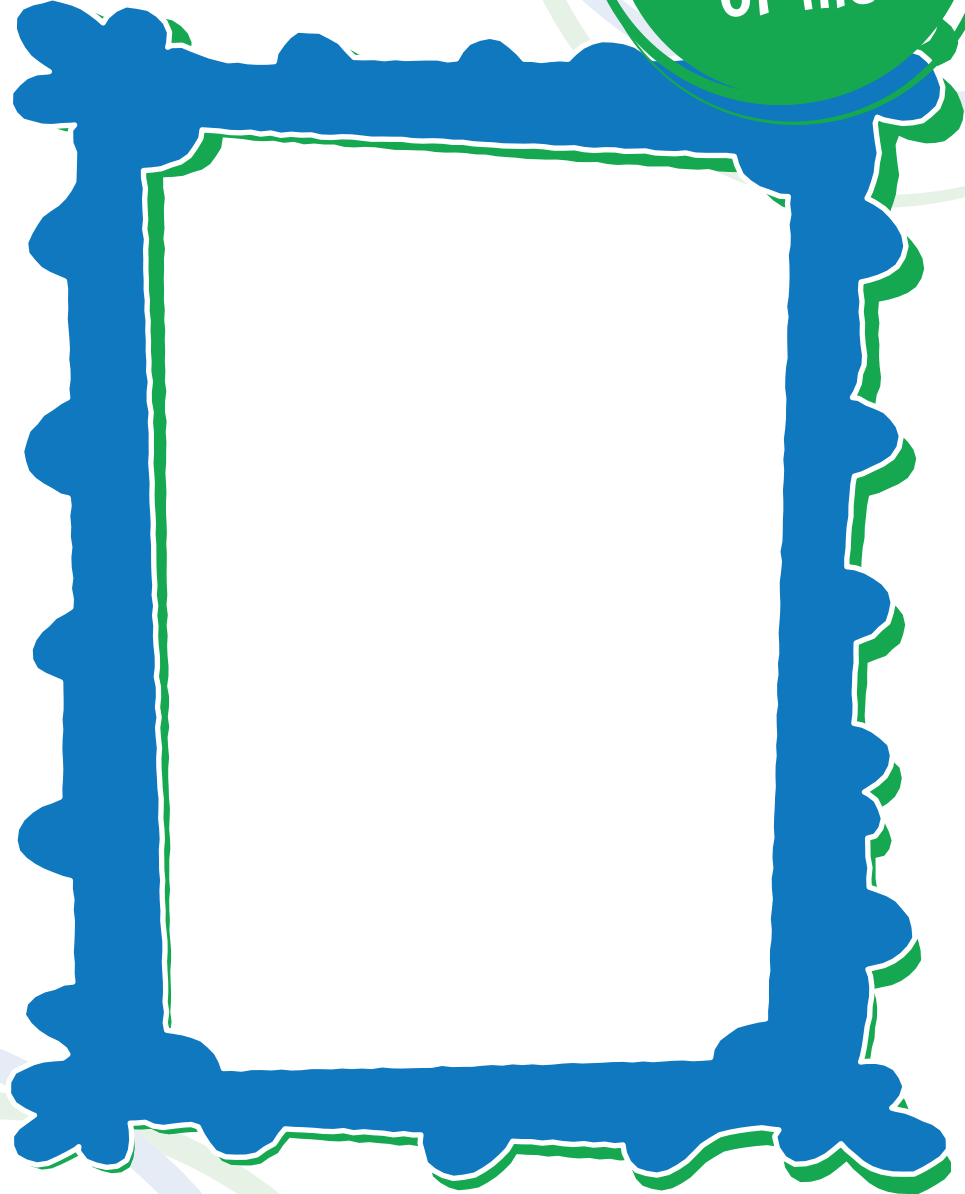

I am \_\_\_\_\_ years old

My eye colour is \_\_\_\_\_

My height is \_\_\_\_\_ cm

My hair colour is \_\_\_\_\_

My weight is \_\_\_\_\_ kg
