# Supplementary material for: Growing up in Bradford: protocol for the age 7–11 follow up of the Born in Bradford birth cohort
Source: BMC Public Health. 2019 Jul 12;19:939. doi: 10.1186/s12889-019-7222-2 (PMC6626420; doi:10.1186/s12889-019-7222-2)
Supplement: Supplementary file 2 — Overview of questionnaire domains and sources. Three tables summarising questionnaire domains and sources using in the Born in Bradford age 7–11 assessments (PDF 336 kb) [file 12889_2019_7222_MOESM2_ESM.pdf]

## Additional file 2: Overview of questionnaire domains and sources

**Table A2.1: Child diet and activity questionnaire domains and sources**

| Domain                                    | Source                                                                                                                                                       | Topics covered                                                                                                                                        |
|-------------------------------------------|--------------------------------------------------------------------------------------------------------------------------------------------------------------|-------------------------------------------------------------------------------------------------------------------------------------------------------|
| Physical activity and sedentary behaviour | Bespoke                                                                                                                                                      | Active travel<br>Sports participation<br>Time outdoors<br>Screen time<br>Activity skills<br>Physical activity enjoyment<br>Knowledge of PA guidelines |
|                                           | Physical Activity Questionnaire for Older Children (PAQ-C) [1]                                                                                               | Activity in last 7 days                                                                                                                               |
|                                           | Parent and Peer Support Questionnaire [2]                                                                                                                    | Support from friends, parents and teachers to take part in physical activity/sport                                                                    |
| Diet                                      | Day in the Life Of... (DILO) questionnaire [3]                                                                                                               | Food/drink consumption on previous day                                                                                                                |
|                                           | Bespoke                                                                                                                                                      | Normal school lunch<br>Takeaways                                                                                                                      |
| Acculturation                             | Based on Acculturation Rating Scale for Mexican Americans-II for Children and Adolescents (ARSMA) [4] Questions adapted for use with South Asian population. | Clothing<br>Food<br>Holidays celebrated by family/friends                                                                                             |

**Table A2.2: Parent questionnaire domains and sources**

| Domain                                    | Source                                                         | Topics covered                                                                                                                         |
|-------------------------------------------|----------------------------------------------------------------|----------------------------------------------------------------------------------------------------------------------------------------|
| Demographics                              | BiB baseline questionnaire                                     | Ethnic background<br>Household composition<br>Pregnancy                                                                                |
| Home                                      | Bespoke                                                        | Home ownership<br>Number of bedrooms<br>Smartphone access                                                                              |
| Neighbourhood                             | Bespoke                                                        | Availability, satisfaction and use of outdoor/green spaces                                                                             |
| Socio-economic circumstances              | Bespoke. Developed to map to ISCED levels [5]                  | Highest educational qualification                                                                                                      |
|                                           | National Statistics Socio-economic Classification (NS-SEC) [6] | Socio-economic Classification                                                                                                          |
|                                           | Bespoke                                                        | Household income<br>Financial circumstances                                                                                            |
| Social circumstances                      | World Values Survey [7]                                        | Trust of people                                                                                                                        |
|                                           | Growing Up in Australia survey [8]                             | Family attachment and affection                                                                                                        |
|                                           | ONS social capital harmonised question set [9]                 | Voting in elections<br>Belief that can influence decisions affecting local area                                                        |
| Health and health behaviour               | Bespoke                                                        | Health conditions<br>Medication<br>Smoking<br>E-cigarette use<br>Alcohol consumption (based on chief medical officer guidelines, 2016) |
|                                           | Millennium Cohort Study [10]                                   | Longstanding illness/disability and impact<br>Drug use                                                                                 |
|                                           | Personal Health Questionnaire Depression Scale (PHQ-8) [11]    | Depression                                                                                                                             |
|                                           | Generalized Anxiety Disorder Screener (GAD-7) [12]             | Anxiety                                                                                                                                |
|                                           | Short form of the General Self-Efficacy Scale (GSE-6) [13]     | Self-efficacy                                                                                                                          |
| Physical activity and sedentary behaviour | Bespoke                                                        | Television viewing<br>Sitting time                                                                                                     |

|                                                           |                                                                                                                                                      |                                                                                                          |
|-----------------------------------------------------------|------------------------------------------------------------------------------------------------------------------------------------------------------|----------------------------------------------------------------------------------------------------------|
|                                                           | Active Australia Survey [14]                                                                                                                         | Vigorous, moderate and walking activity time                                                             |
| Child health, development and behaviours                  | Millennium Cohort Study [10]                                                                                                                         | Long-term health conditions and impact<br>Diagnoses<br>Wheezing<br>Bed-wetting<br>Hospital attendance    |
|                                                           | Parental-Caregiver Perceptions Questionnaire (P-CPQ) in Child Oral Health Quality of Life Questionnaire (COHQOL) [15]                                | Health of teeth and mouth<br>Impact                                                                      |
|                                                           | Bespoke                                                                                                                                              | Sleep patterns<br>Puberty                                                                                |
| Social and emotional wellbeing                            | Strengths and Difficulties Questionnaire [16]                                                                                                        | Child's socio-emotional and behavioural difficulties                                                     |
| Acculturation                                             | Bespoke questions based on Acculturation Rating Scale for Mexican Americans-II for Children and Adolescents (ARSMA) [4] and acculturation scale [17] | Speaking/watching TV/reading in English/South Asian language<br>Clothing and food<br>Holidays celebrated |
| Additional question modules for sub-samples of the cohort |                                                                                                                                                      |                                                                                                          |
| Diet                                                      | Children's Dietary Questionnaire [18]                                                                                                                | Fruit/vegetable consumption<br>Fat consumption<br>Snack consumption                                      |
|                                                           | Healthy Home Survey [19]                                                                                                                             | Where meals are eaten                                                                                    |
| Food insecurity                                           | Short Form of the 18-item U.S. Household Food Security Survey Module [20]                                                                            | Able to afford food/balanced meals                                                                       |
| Physical activity                                         | Parent supporting and controlling practices questionnaire [21]                                                                                       | Family physical activity<br>Influences of parent behaviour<br>Support to do physical activity            |
|                                                           | Bespoke                                                                                                                                              | Knowledge of physical activity guidelines                                                                |
| Parenting                                                 | Growing Up in Australia [8]                                                                                                                          | Confidence in parenting<br>Views on child rearing<br>Behaviour to child                                  |
| Allergies                                                 | ISAAC phase III questionnaire 6-7 years [22]                                                                                                         | Asthma<br>Allergies<br>Eczema                                                                            |

**Table A2.3: Child ‘me and my life’ questionnaire domains and sources**

| Domain                         | Source                                                                                                                                                       | Topics covered                                                                           |
|--------------------------------|--------------------------------------------------------------------------------------------------------------------------------------------------------------|------------------------------------------------------------------------------------------|
| Family and home                | Bespoke                                                                                                                                                      | Satisfaction with home and local parks                                                   |
|                                | Adapted from Millennium Cohort Study (MCS) Sweep 4 (age 7) [23]                                                                                              | Family relationships                                                                     |
|                                | Bespoke                                                                                                                                                      | Languages spoken                                                                         |
| Wellbeing and feelings         | Child material wellbeing index developed for the Children’s Society[24] and socially perceived necessities from the Poverty and Social Exclusion group[25].  | Material wellbeing (including access to pocket money, a laptop, holidays, a car, garden) |
|                                | Children’s Worlds. International survey of child wellbeing. Age 10 questionnaire. [26]                                                                       | Concern about money                                                                      |
|                                | MCS Sweep 4 (age 7) [23]                                                                                                                                     | Feeling happy, sad, worried                                                              |
|                                | Bespoke                                                                                                                                                      | Feeling unwell, healthy; can work out what to do next when find something hard           |
| Friends, school and activities | Adapted from MCS Sweep 4 (age 7) [23]                                                                                                                        | Friends, bullying                                                                        |
|                                | MCS Sweep 4 (age 7) [23]                                                                                                                                     | School                                                                                   |
|                                | Bespoke                                                                                                                                                      | Clubs and activities                                                                     |
| Religion and acculturation     | Bespoke                                                                                                                                                      | Religion                                                                                 |
|                                | Based on Acculturation Rating Scale for Mexican Americans-II for Children and Adolescents (ARSMA) [4] Questions adapted for use with South Asian population. | Clothing, Food, Holidays                                                                 |

## REFERENCES

1. Kowalski KC, Crocker PRE, Donen RM: **The Physical Activity Questionnaire for Older Children (PAQ-C) and Adolescents (PAQ-A) Manual** In. Edited by College of Kinesiology UoS. Canada; 2004: 1-38.
2. Prochaska JJ, Rodgers MW, Sallis JF: **Association of parent and peer support with adolescent physical activity.** *Research quarterly for exercise and sport* 2002, **73**(2):206-210.
3. Kipping RR, Jago R, Lawlor DA: **Diet outcomes of a pilot school-based randomised controlled obesity prevention study with 9–10year olds in England.** *Preventive medicine* 2010, **51**(1):56-62.

4. Bauman S: **The reliability and validity of the Brief Acculturation Rating Scale for Mexican Americans-II for children and adolescents.** *Hispanic Journal of Behavioral Sciences* 2005, **27**(4):426-441.
5. UNESCO: **International Standard Classification of Education: ISCED 2011.** In. <http://www.uis.unesco.org/Education/Documents/isced-2011-en.pdf>; 2012.
6. Office for National Statistics. **The National Statistics Socio-economic classification (NS-SEC).** <https://www.ons.gov.uk/methodology/classificationsandstandards/otherclassifications/thenationalstatisticsocioeconomicclassificationnssecbasedonsoc2010> accessed 20/03/2019.
7. World Values Survey. <http://www.worldvaluessurvey.org/WVSDocumentationWV6.jsp> accessed 20/03/2019
8. Longitudinal Study of Australian Children. **Wave 7 Data Dictionary, Growing Up in Australia Wave** [<http://www.growingupinaustralia.gov.au/data/datadict/index.html>] accessed 20/03/2019
9. Green H, Fletcher L: **Social Capital Harmonised Question Set. A guide to questions for use in the measurement of social capital.** In.: Office for National Statistics, Social and Vital Statistics Division; 2003.
10. Millennium Cohort Study (2006) **Second Survey: CAPI Questionnaire Documentation.** Centre for Longitudinal Studies, University of London. [https://cls.ucl.ac.uk/wp-content/uploads/2017/07/mcs3\\_capi\\_questionnaire\\_documentation\\_final.pdf](https://cls.ucl.ac.uk/wp-content/uploads/2017/07/mcs3_capi_questionnaire_documentation_final.pdf) accessed 20/03/2019
11. Kroenke K, Strine TW, Spitzer RL, Williams JBW, Berry JT, Mokdad AH: **The PHQ-8 as a measure of current depression in the general population.** *Journal of Affective Disorders* 2009, **114**(1–3):163-173.
12. Löwe B, Decker O, Müller S, Brähler E, Schellberg D, Herzog W, Herzberg PY: **Validation and standardization of the Generalized Anxiety Disorder Screener (GAD-7) in the general population.** *Medical Care* 2008, **46**(3):266-274.
13. Romppel M, Herrmann-Lingen C, Wachter R, Edelmann F, Dungen HD, Pieske B, Grande G: **A short form of the General Self-Efficacy Scale (GSE-6): Development, psychometric properties and validity in an intercultural non-clinical sample and a sample of patients at risk for heart failure.** *Psycho-social Medicine* 2013, **10**:doc1.
14. Australian Institute of Health and Welfare (AIHW): **The Active Australia Survey: a guide and manual for implementation, analysis and reporting.** Canberra: AIHW; 2003.
15. Jokovic A, Locker D, Stephens M, Kenny D, Tompson B, Guyatt G: **Measuring Parental Perceptions of Child Oral Health-related Quality of Life.** *Journal of Public Health Dentistry* 2003, **63**(2):67-72.
16. Goodman R: **The extended version of the Strengths and Difficulties Questionnaire as a guide to child psychiatric caseness and consequent burden.** *Journal of Child Psychology and Psychiatry* 1999, **40**:791-801.
17. Palmer B, Macfarlane G, Afzal C, Esmail A, Silman A, Lunt M: **Acculturation and the prevalence of pain amongst South Asian minority ethnic groups in the UK.** *Rheumatology* 2007, **46**(6):1009-1014.
18. Magarey A, Golley R, Spurrier N, Goodwin E, Ong F: **Reliability and validity of the Children's Dietary Questionnaire; a new tool to measure children's dietary patterns.** *International Journal of Pediatric Obesity* 2009, **4**(4):257-265
19. Bryant MJ, Ward DS, Hales D, Vaughn A, Tabak RG, Stevens J: **Reliability and validity of the Healthy Home Survey: a tool to measure factors within homes hypothesized to relate to overweight in children.** *International Journal of Behavioral Nutrition and Physical Activity* 2008, **5**(1):1
20. Hamilton W, Cook J, Thompson W, Buron L, Frongillo C, Olson C: **Household food security in the United States in 1995: Technical report of the food security measurement project.** In.

- Alexandria (VA), US: United States Department of Agriculture, Food and Consumer Service; 1997.
21. Vaughn A, Hales D, Ward DS: **Measuring the physical activity practices used by parents of preschool children.** *Med Sci Sports Exerc* 2013, **45**(12):2369.
  22. Ellwood P, Asher M, Beasley R, Clayton T, Stewart A, Committee IS: **The International Study of Asthma and Allergies in Childhood (ISAAC): Phase Three rationale and methods [Research Methods].** *The International Journal of Tuberculosis and Lung Disease* 2005, **9**(1):10-16.
  23. **Child of the New Century. Age 7 Survey.** <https://cls.ucl.ac.uk/cls-studies/millennium-cohort-study/mcs-age-7-sweep/> accessed 20/03/2019
  24. Main G, Pople L: **Missing out: A child centred analysis of material deprivation and subjective well-being.** London; 2011.
  25. Main G, Bradshaw J: **Child poverty and social exclusion: Final report of 2012 PSE study.** York; 2014.
  26. **Children's Worlds. International survey of children's wellbeing.** <http://www.isciweb.org/?CategoryID=190> accessed 20/03/2019.
