# Supplementary material for: Growing up in Bradford: protocol for the age 7–11 follow up of the Born in Bradford birth cohort
Source: BMC Public Health. 2019 Jul 12;19:939. doi: 10.1186/s12889-019-7222-2 (PMC6626420; doi:10.1186/s12889-019-7222-2)

## Additional file 7: Example of Child assessment feedback summary for teachers

### Born in Bradford: The Primary School Years

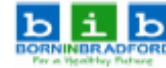

Handedness: Right

Date of Test: 24/01/2019

#### SNAPSHOT

This report should not be used as a screening or predictive tool, rather as a snapshot of the child's development at this point in time.

Room for Improvement

Doing Well

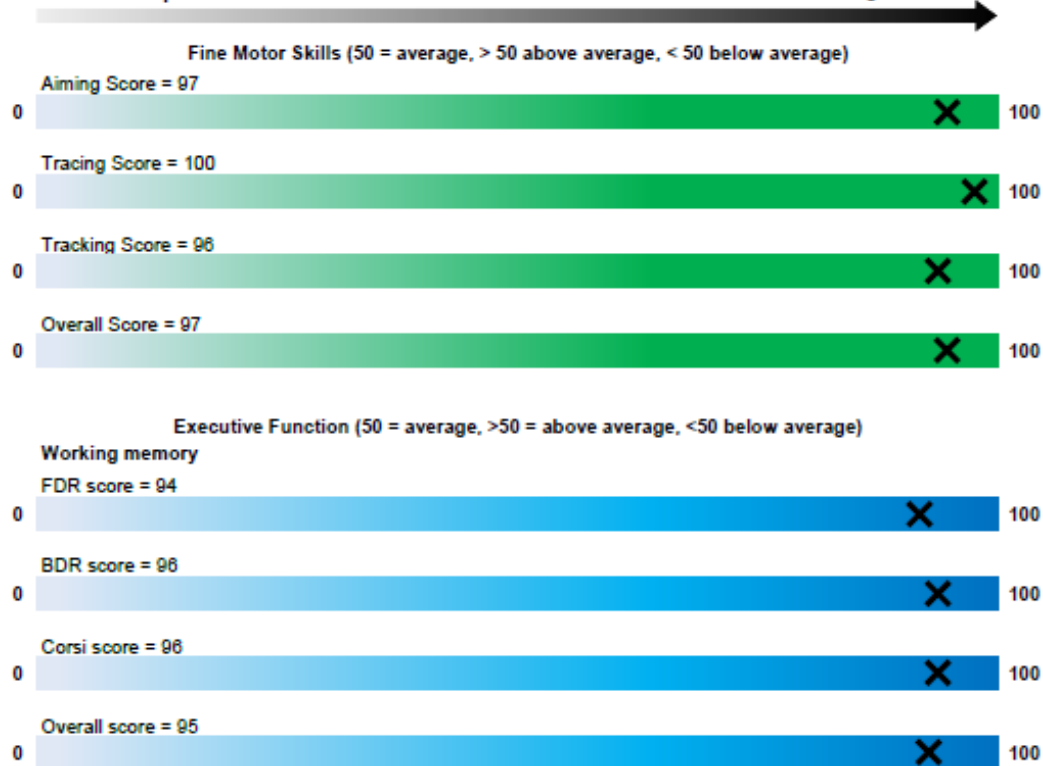

Supplement: Supplementary file 7 — Example of Child assessment feedback summary for teachers. Image of child assessment feedback summary for teachers (PDF 192 kb) [file 12889_2019_7222_MOESM7_ESM.pdf]
